# Supplementary material for: Mangostanin, a Xanthone Derived from Garcinia mangostana Fruit, Exerts Protective and Reparative Effects on Oxidative Damage in Human Keratinocytes
Source: MDPI journal article supplement (doi:10.3390/ph15010084), 2022-01-11
Supplement: s1 [file s1]

## Supplementary information

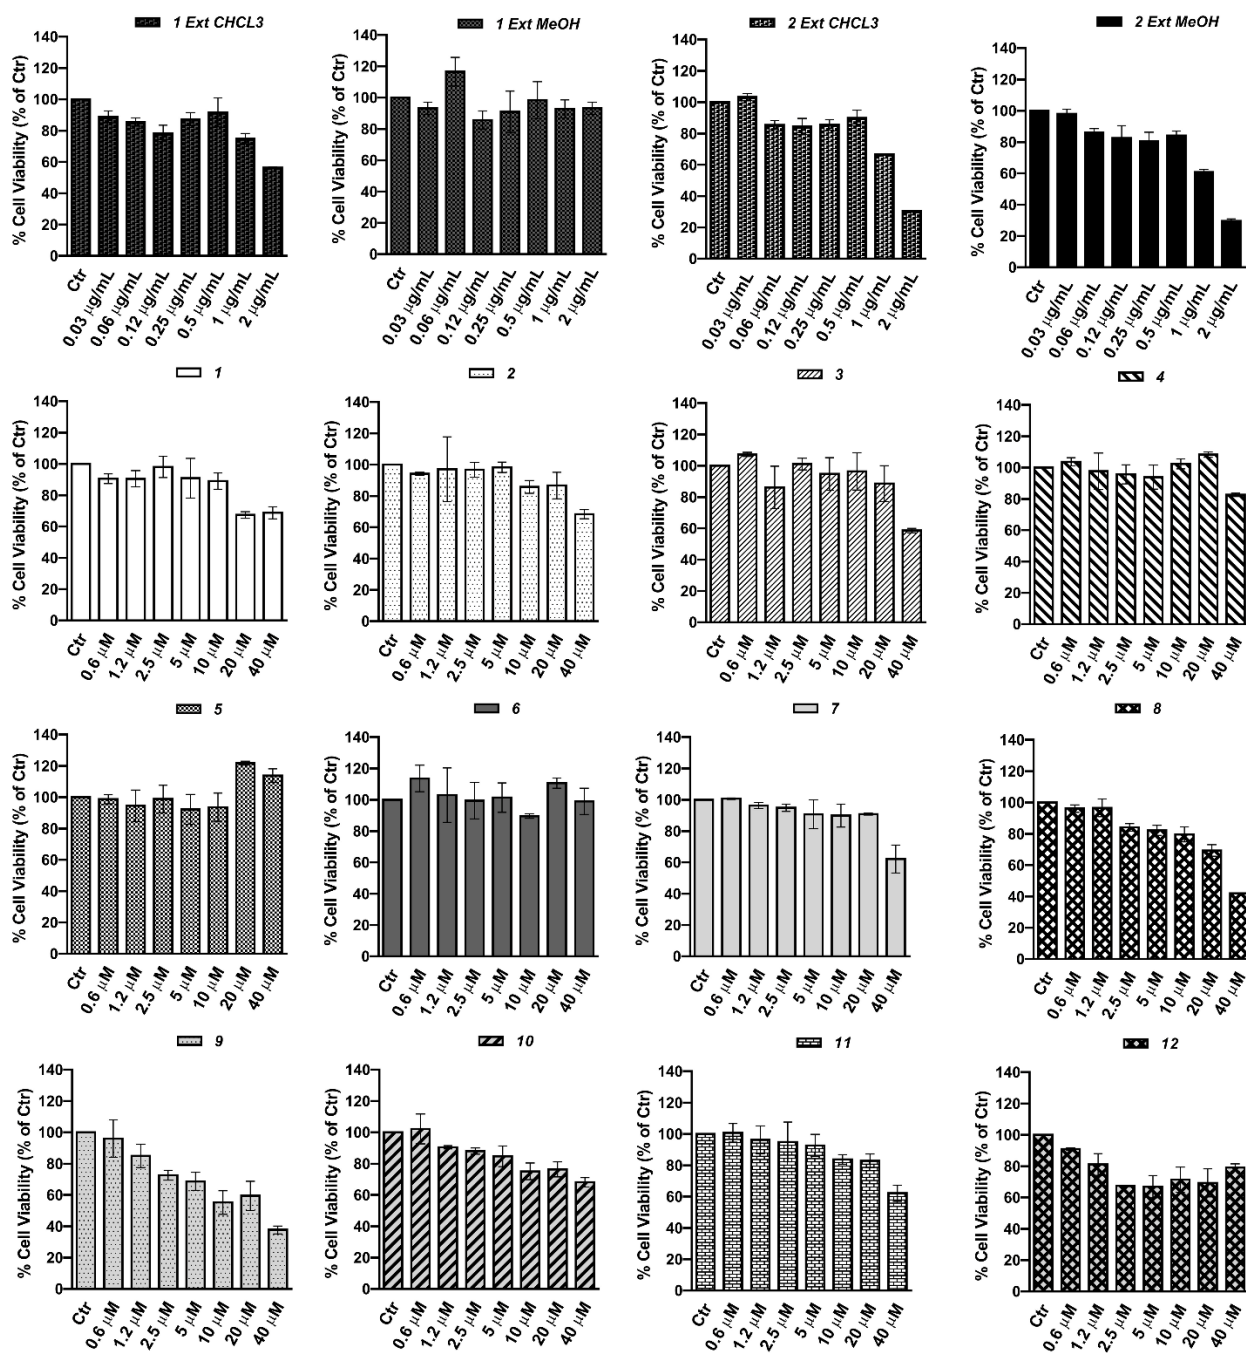

**Figure S1.** Evaluation of 1 Ext MeOH, 1 Ext CHCl<sub>3</sub>, 2 Ext MeOH, 2 Ext MeOH, 1, 2, 3, 4, 5, 6, 7, 8, 9, 11, and 12 effects in HaCaT Cells. HaCaT cells were cultured for 48 h in the presence of the indicated concentrations (0-40  $\mu$ M) of individual substances or extracts ( $\mu$ g/mL) before MTT assay. Results are expressed as means  $\pm$  SD of independent experiments performed in triplicate and reported as percentage *vs.* the untreated control).
